# Supplementary material
Source: ML conference proceedings conference paper supplement (https://openreview.net/forum?id=7qhBXq0NLN)
Supplement: supplementary_material [file attachment]

Anonymous Repo Here:

<https://anonymous.4open.science/r/p-impersona-review-E3B4/README.md>
